# Supplementary material for: Magnetocaloric effects in the quasi-1D chain carbonate NaDy(CO 3 )F 2 through crystallographic directional rotation
Source: Royal Society of Chemistry journal article supplement (doi:10.1039/d4tc04733h), 2025-01-01
Supplement: d4tc04733h1.pdf [file d4tc04733h1.pdf]

## Supporting Information

### Magnetocaloric Effect in the Quasi-1D Chain Carbonate $\text{NaDy}(\text{CO}_3)\text{F}_2$ Through Crystallographic Directional Rotation

Ruixin Guo <sup>§a,b</sup>, Jingfang Tong <sup>§c,e</sup>, Lun Jin <sup>d</sup>, Weijie Lin <sup>a,b</sup>, Zhengzhong Deng <sup>c</sup>, Changzhao Pan <sup>b</sup>, Haitao Zhou <sup>c</sup>, Shu Guo <sup>\*a,b</sup>

<sup>a</sup> Shenzhen Institute for Quantum Science and Engineering, Southern University of Science and Technology, Shenzhen 518055, China.

<sup>b</sup> International Quantum Academy, Shenzhen 518048, China.

<sup>c</sup> Guangxi Key Laboratory of Superhard Materials, China Nonferrous Metals (Guilin) Geology and Mining Co., Ltd, China

<sup>d</sup> Key Laboratory of Quantum Materials and Devices of Ministry of Education, School of Physics, Southeast University, Nanjing 211189, China

<sup>e</sup> College of Materials Science and Engineering, Guilin University of Technology, Guilin 541004, P. R. China.

## Table of Contents

|                  |                                                                                                                                                                                                                                      |                |
|------------------|--------------------------------------------------------------------------------------------------------------------------------------------------------------------------------------------------------------------------------------|----------------|
|                  | EXPERIMENTAL SECTION                                                                                                                                                                                                                 | <b>S3</b>      |
| <b>Figure S1</b> | Rietveld plots of P-XRD data for NaDy(CO <sub>3</sub> )F <sub>2</sub> .                                                                                                                                                              | <b>S4</b>      |
| <b>Figure S2</b> | Relevant dihedral angles for the DyO <sub>4</sub> F <sub>4</sub> polyhedra in the crystal structure of NaDy(CO <sub>3</sub> )F <sub>2</sub> .                                                                                        | <b>S5</b>      |
| <b>Figure S3</b> | The IR spectroscopy of NaDy(CO <sub>3</sub> )F <sub>2</sub> .                                                                                                                                                                        | <b>S6</b>      |
| <b>Figure S4</b> | Specific heat divided by temperature, $C_p/T$ , vs $T$ of NaDy(CO <sub>3</sub> )F <sub>2</sub> polycrystalline sample at several magnetic fields.                                                                                    | <b>S7</b>      |
| <b>Figure S5</b> | The magnetic phase diagram of NaDy(CO <sub>3</sub> )F <sub>2</sub> along the crystallographic $b$ -axis with $C(T, B)$ measurements data.                                                                                            | <b>S8</b>      |
| <b>Table S1</b>  | Crystal Data and Structure Refinements for NaDy(CO <sub>3</sub> )F <sub>2</sub> .                                                                                                                                                    | <b>S9</b>      |
| <b>Table S2</b>  | Fractional atomic coordinates and equivalent isotropic displacement parameters (Å <sup>2</sup> ) for NaDy(CO <sub>3</sub> )F <sub>2</sub> .                                                                                          | <b>S10</b>     |
| <b>Table S3</b>  | Atomic displacement parameters (Å <sup>2</sup> ) for NaDy(CO <sub>3</sub> )F <sub>2</sub> .                                                                                                                                          | <b>S10</b>     |
| <b>Table S4</b>  | Geometric parameters (Å) for NaDy(CO <sub>3</sub> )F <sub>2</sub> .                                                                                                                                                                  | <b>S10-S12</b> |
| <b>Table S5</b>  | Selected bond lengths (Å), bond valence (BV), and bond valence sum (BVS) for NaDy(CO <sub>3</sub> )F <sub>2</sub> .                                                                                                                  | <b>S13</b>     |
| <b>Table S6</b>  | Weiss temperatures ( $\Theta$ ), Curie constant ( $C$ ), temperature-independent contribution ( $\chi_0$ ), and effective moments ( $\mu_{eff}$ ) are determined by fitting the Curie–Weiss law to the magnetic susceptibility data. | <b>S14</b>     |
|                  | References                                                                                                                                                                                                                           | <b>S15</b>     |

## EXPERIMENTAL SECTION

**Reagents.**  $\text{Na}_2\text{CO}_3$  (99.5%, Rhawn), NaF (98%, Macklin), and  $\text{Dy}(\text{NO}_3)_3 \cdot 6\text{H}_2\text{O}$  (99.9%, Macklin), were used as received.

**Synthesis.** Tiny single crystals of  $\text{NaDy}(\text{CO}_3)\text{F}_2$  were grown using the hydrothermal method. 0.53 g  $\text{Na}_2\text{CO}_3$  (0.005 mol) and 0.21 g NaF (0.005 mol) were mixed with about 1.14 g (0.0025 mol) of  $\text{Dy}(\text{NO}_3)_3 \cdot 6\text{H}_2\text{O}$ , added to 10 ml  $\text{H}_2\text{O}$  in an autoclave equipped with a PTFE liner (25 mL) to synthesize the samples. The mixture was heated at 220°C for two days, then cooled to room temperature for two days. The rod-shaped crystals were obtained, and the products were washed with deionized water and alcohol alternatively. Single crystals of  $\text{NaDy}(\text{CO}_3)\text{F}_2$  were obtained, and both of them were isostructural with  $\text{NaYb}(\text{CO}_3)\text{F}_2$ <sup>1</sup>. A high-temperature hydrothermal synthesis technique was applied to obtain millimeter-scale crystals to study the anisotropic magnetic properties of  $\text{NaDy}(\text{CO}_3)\text{F}_2$ . The 0.212 g  $\text{Na}_2\text{CO}_3$ , 0.336 g NaF, 0.457 g  $\text{Dy}(\text{NO}_3)_3 \cdot 6\text{H}_2\text{O}$ , and 2 ml  $\text{H}_2\text{O}$  were mixed into a 10 mm gold linear diameter and placed in a diameter of 22 mm and a volume of 70 ml autoclave. Then the autoclave was placed in the resistance furnace, and the furnace body temperature was set to 500-650 °C; after two days of constant temperature growth, the cooling program was set up, the temperature was slowly reduced to 100 °C, and then it is naturally cooled to room temperature, the autoclave is opened, and the millimeter-level  $\text{NaDy}(\text{CO}_3)\text{F}_2$  single crystals were obtained.

**Structure Determination and Power X-ray Diffraction (P-XRD).** Single crystal X-ray diffraction (SC-XRD) data for  $\text{NaDy}(\text{CO}_3)\text{F}_2$  were collected on a Bruker D8 VENTURE diffractometer at 100 K. The detector is PHOTON III C14 with graphite-monochromatized Mo  $K\alpha$  radiation ( $\lambda = 0.71073 \text{ \AA}$ ). The raw data were corrected for background, polarization, and Lorentz factor using APEX4 software, and absorption correction based on the multiscan using the SADABS program package. The structures of  $\text{NaDy}(\text{CO}_3)\text{F}_2$  were solved through the ShelXT program and refined by the ShelXL least-squares refinement package<sup>2</sup>. Also, the ADDSYM algorithm in the program PLATON was used to trace the possible higher symmetry<sup>3</sup>. The Powder X-ray diffraction (P-XRD) of  $\text{NaRE}(\text{CO}_3)\text{F}_2$  ( $RE = \text{Tb-Er}$ ) was measured on a Rigaku SmartLab 9 KW instrument equipped with CuK-beta radiation, transmission geometry, and a linear BB detector. To ensure the phase purity of the synthesized  $\text{NaDy}(\text{CO}_3)\text{F}_2$ , P-XRD analysis was performed using the GSAS II software. This refinement indicates a good agreement between the observed and calculated diffraction patterns, confirming the phase purity and structural accuracy of the  $\text{NaDy}(\text{CO}_3)\text{F}_2$ . The Cambridge Crystallographic Data Centre (CCDC) of  $\text{NaDy}(\text{CO}_3)\text{F}_2$  is 2381122.

**Infrared (IR) spectroscopy.** The Fourier transform infrared spectroscopy (FTIR) spectrum for  $\text{NaDy}(\text{CO}_3)\text{F}_2$  was collected on the Excalibur 3100 infrared spectrometer in the range of 600-1600  $\text{cm}^{-1}$ .

**Physical properties.** Magnetic susceptibility was measured using a Quantum Design Magnetic Properties Measurement System (MPMS3) magnetometer. The powder samples of  $\text{NaDy}(\text{CO}_3)\text{F}_2$  (9.22 mg) were prepared for magnetization characterization. The temperature dependency of magnetic susceptibility ( $\chi$ ) was measured at  $B = 0.2 \text{ T}$  in the range of 1.8-300 K. The polycrystalline samples were encapsulated within gel capsules affixed to brass rods. Magnetization ( $M$ ) versus magnetic field ( $B$ ) curves were performed at 1.8 K from -7 T to 7 T. For the single crystals, GE varnish was used to affix it to a quartz rod. The anisotropic  $\chi(T)$  curves from 1.8 to 300 K at 0.2 T and isothermal  $M(B)$  from 2 K to 16 K curves of  $\text{NaDy}(\text{CO}_3)\text{F}_2$  were measured. The  $\text{NaDy}(\text{CO}_3)\text{F}_2$  powder sample was pressed into a pellet with a mass of 1.4 mg for a specific heat test. The Quantum Design Physical Property Measurement System (PPMS) was used to measure the specific heat.

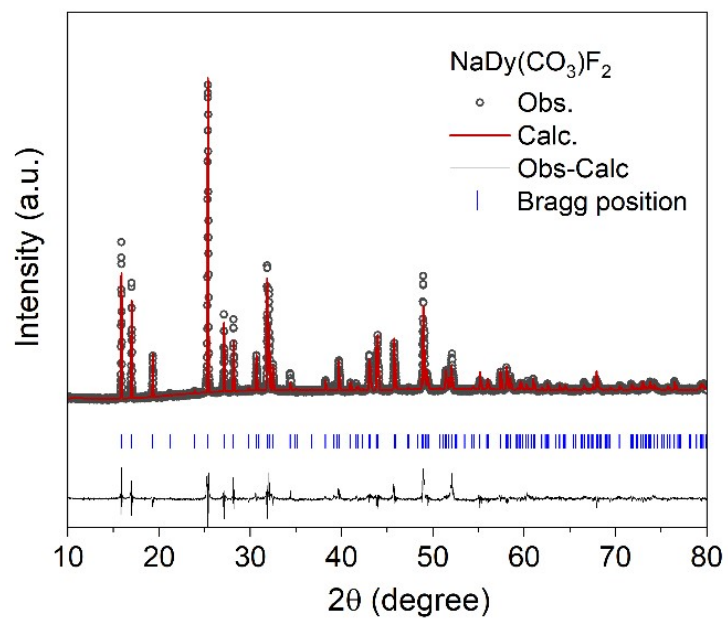

**Figure S1.** Rietveld plots of P-XRD data for NaDy(CO<sub>3</sub>)F<sub>2</sub>.

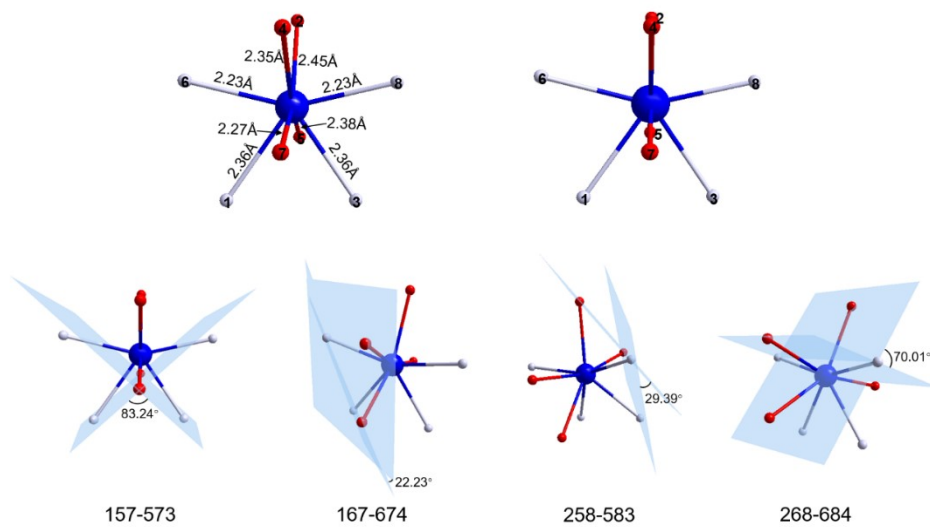

**Figure S2.** Relevant dihedral angles for the  $\text{DyO}_4\text{F}_4$  polyhedra in the crystal structure of  $\text{NaDy}(\text{CO}_3)\text{F}_2$ .

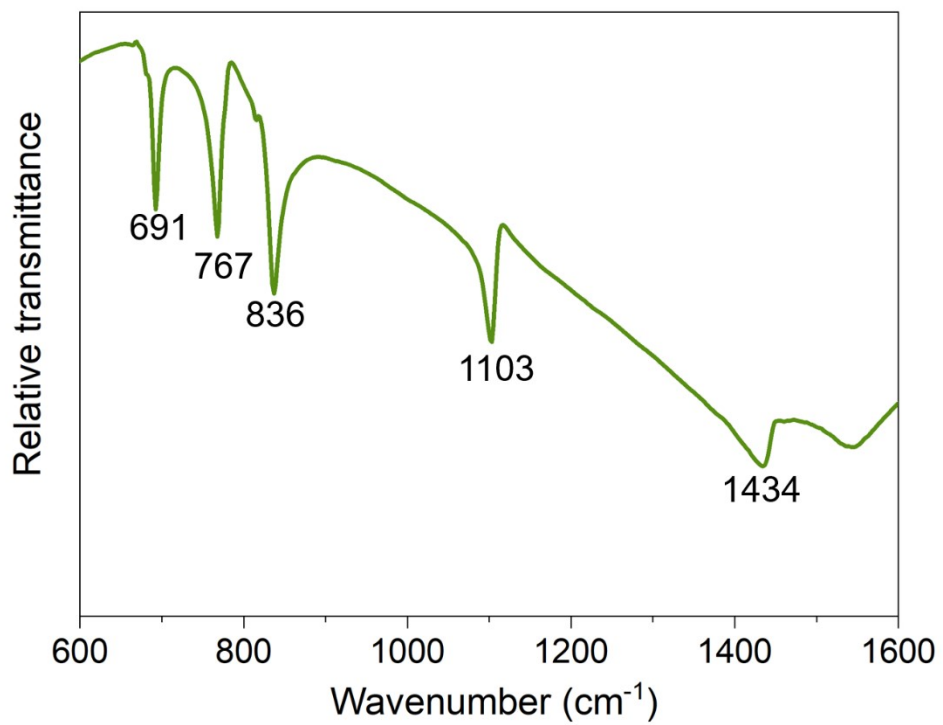

**Figure S3.** The IR spectroscopy of NaDy(CO<sub>3</sub>)F<sub>2</sub>.

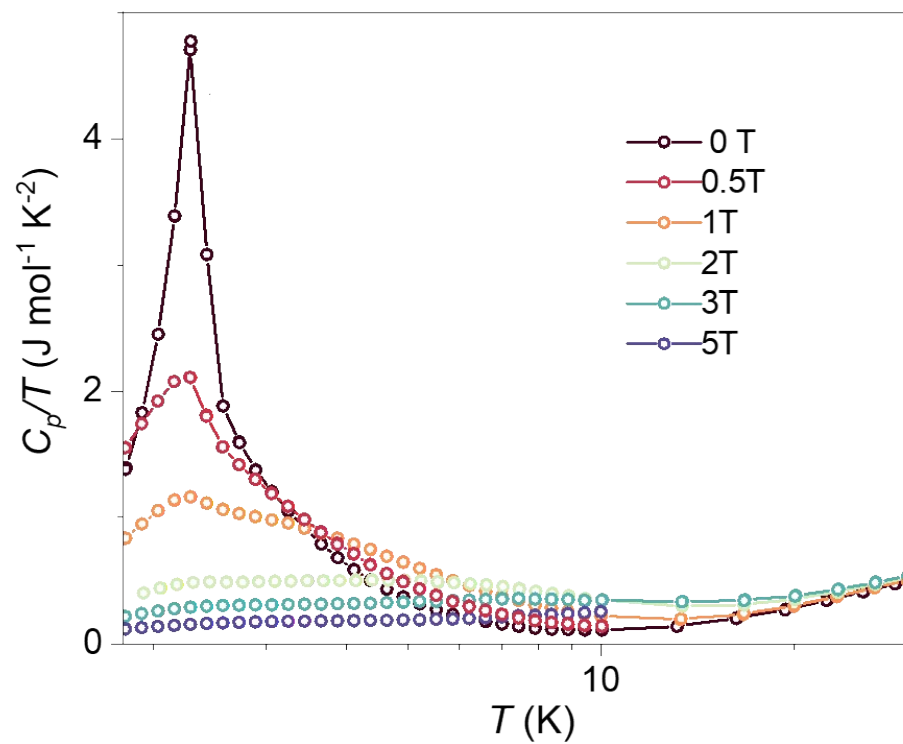

**Figure S4.** Specific heat divided by temperature,  $C_p/T$ , vs  $T$  of  $\text{NaDy}(\text{CO}_3)\text{F}_2$  polycrystalline sample at several magnetic fields.

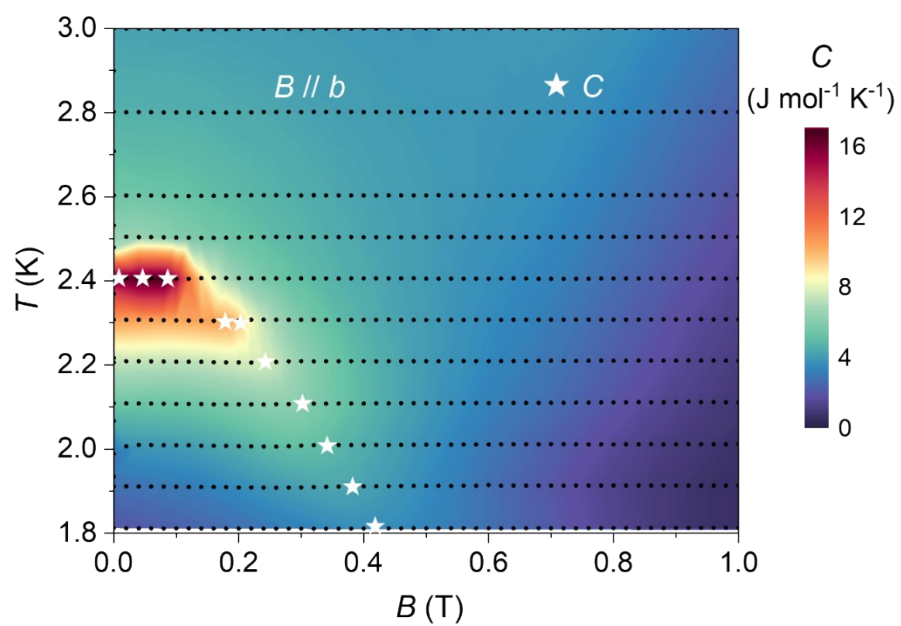

**Figure S5.** The magnetic phase diagram of  $\text{NaDy}(\text{CO}_3)\text{F}_2$  along the crystallographic  $b$ -axis with  $C(T,B)$  measurements data.



**Table S1.** Crystal Data and Structure Refinements for NaDy(CO<sub>3</sub>)F<sub>2</sub>.

|                                                                   |                                                              |
|-------------------------------------------------------------------|--------------------------------------------------------------|
| Empirical formula                                                 | NaDy(CO <sub>3</sub> )F <sub>2</sub>                         |
| Temperature/K                                                     | 100 K                                                        |
| Crystal system                                                    | Orthorhombic                                                 |
| Space group                                                       | <i>Pnma</i>                                                  |
| Formula weight                                                    | 283.50                                                       |
| <i>a</i> /Å                                                       | 6.3264(5)                                                    |
| <i>b</i> /Å                                                       | 6.9952(6)                                                    |
| <i>c</i> /Å                                                       | 9.1656(6)                                                    |
| volume/Å <sup>3</sup>                                             | 405.62(5)                                                    |
| <i>Z</i>                                                          | 4                                                            |
| $\rho_{calc}$ /g/cm <sup>3</sup>                                  | 4.642                                                        |
| $\mu$ /mm <sup>-1</sup>                                           | 18.469                                                       |
| <i>F</i> (000)                                                    | 500                                                          |
| Crystal size/mm <sup>3</sup>                                      | 0.03 × 0.02 × 0.012                                          |
| radiation                                                         | Mo K $\alpha$ ( $\lambda$ = 0.71073)                         |
| 2 $\theta$ range for data collection/ $^{\circ}$                  | 7.328-60.998                                                 |
| Index ranges                                                      | -9 $\leq h \leq$ 9, -9 $\leq k \leq$ 9, -11 $\leq l \leq$ 13 |
| Reflections collected                                             | 12350                                                        |
| Independent reflections                                           | 662 [R <sub>int</sub> = 0.0549]                              |
| Goodness-of-fit on <i>F</i> <sup>2</sup>                          | 1.100                                                        |
| Final <i>R</i> indexes [ <i>I</i> $\geq$ 2 $\sigma$ ( <i>I</i> )] | R1 = 0.0207, wR2 = 0.0513                                    |
| Final <i>R</i> indexes [all data]                                 | R1 = 0.0220, wR2 = 0.0525                                    |

**Table S2.** Fractional atomic coordinates and equivalent isotropic displacement parameters ( $\text{\AA}^2$ ) for  $\text{NaDy}(\text{CO}_3)\text{F}_2$ .

|     | x           | y          | z           | $U_{\text{eq}}$ |
|-----|-------------|------------|-------------|-----------------|
| Dy1 | 0.01266 (3) | 0.250000   | 0.57837 (2) | 0.00412 (12)    |
| Na1 | 0.1719 (3)  | 0.250000   | 0.2178 (2)  | 0.0110 (4)      |
| F1  | 0.0418 (3)  | 0.5607 (3) | 0.6308 (2)  | 0.0072 (4)      |
| O1  | 0.3680 (5)  | 0.250000   | 0.6855 (4)  | 0.0087 (7)      |
| O2  | 0.6582 (6)  | 0.250000   | 0.5441 (4)  | 0.0104 (7)      |
| O3  | 0.3372 (6)  | 0.250000   | 0.4461 (4)  | 0.0085 (7)      |
| C1  | 0.4601 (9)  | 0.250000   | 0.5583 (6)  | 0.0062 (9)      |

**Table S3.** Atomic displacement parameters ( $\text{\AA}^2$ ) for  $\text{NaDy}(\text{CO}_3)\text{F}_2$ .

|     | $U^{11}$     | $U^{22}$     | $U^{33}$     | $U^{12}$    | $U^{13}$     | $U^{23}$   |
|-----|--------------|--------------|--------------|-------------|--------------|------------|
| Dy1 | 0.00472 (16) | 0.00426 (16) | 0.00337 (16) | 0.000       | 0.00010 (6)  | 0.000      |
| Na1 | 0.0087 (9)   | 0.0191 (11)  | 0.0053 (9)   | 0.000       | 0.0016 (7)   | 0.000      |
| F1  | 0.0106 (9)   | 0.0062 (9)   | 0.0049 (10)  | -0.0002 (8) | -0.0015 (8)  | 0.0005 (8) |
| O1  | 0.0045 (16)  | 0.0161 (17)  | 0.0054 (16)  | 0.000       | 0.0018 (12)  | 0.000      |
| O2  | 0.0028 (16)  | 0.0204 (19)  | 0.0079 (16)  | 0.000       | -0.0002 (13) | 0.000      |
| O3  | 0.0042 (16)  | 0.0165 (17)  | 0.0048 (15)  | 0.000       | -0.0021 (12) | 0.000      |
| C1  | 0.009 (2)    | 0.002 (2)    | 0.007 (2)    | 0.000       | -0.0022 (18) | 0.000      |

**Table S4.** Geometric parameters ( $\text{\AA}$ ) for  $\text{NaDy}(\text{CO}_3)\text{F}_2$ .

|                                         |             |                                            |             |
|-----------------------------------------|-------------|--------------------------------------------|-------------|
| Dy1—Dy1 <sup>i</sup>                    | 3.7846 (3)  | Na1—Na1 <sup>viii</sup>                    | 3.2178 (8)  |
| Dy1—Na1 <sup>ii</sup>                   | 3.467 (2)   | Na1—F1 <sup>ix</sup>                       | 2.382 (3)   |
| Dy1—Na1                                 | 3.455 (2)   | Na1—F1 <sup>x</sup>                        | 2.382 (3)   |
| Dy1—F1 <sup>iii</sup>                   | 2.355 (2)   | Na1—F1 <sup>iii</sup>                      | 2.347 (3)   |
| Dy1—F1 <sup>iv</sup>                    | 2.233 (2)   | Na1—F1 <sup>v</sup>                        | 2.347 (3)   |
| Dy1—F1 <sup>v</sup>                     | 2.355 (2)   | Na1—O2 <sup>ii</sup>                       | 2.402 (5)   |
| Dy1—F1                                  | 2.233 (2)   | Na1—O3 <sup>ii</sup>                       | 2.596 (4)   |
| Dy1—O1                                  | 2.453 (3)   | Na1—O3                                     | 2.339 (4)   |
| Dy1—O1 <sup>vi</sup>                    | 2.350 (3)   | Na1—C1 <sup>ii</sup>                       | 2.863 (6)   |
| Dy1—O2 <sup>vii</sup>                   | 2.264 (4)   | O1—C1                                      | 1.303 (6)   |
| Dy1—O3                                  | 2.384 (4)   | O2—C1                                      | 1.260 (6)   |
| Dy1—C1                                  | 2.837 (6)   | O3—C1                                      | 1.289 (6)   |
| Na1—Na1 <sup>ii</sup>                   | 3.2178 (8)  |                                            |             |
| Na1 <sup>ii</sup> —Dy1—Dy1 <sup>i</sup> | 71.121 (10) | F1 <sup>v</sup> —Na1—Na1 <sup>ii</sup>     | 47.57 (7)   |
| Na1—Dy1—Dy1 <sup>i</sup>                | 69.464 (9)  | F1 <sup>x</sup> —Na1—Na1 <sup>ii</sup>     | 144.02 (7)  |
| Na1—Dy1—Na1 <sup>ii</sup>               | 55.407 (13) | F1 <sup>iii</sup> —Na1—Na1 <sup>viii</sup> | 117.24 (10) |
| F1 <sup>iv</sup> —Dy1—Dy1 <sup>i</sup>  | 35.49 (5)   | F1 <sup>iii</sup> —Na1—Na1 <sup>ii</sup>   | 47.57 (7)   |

|                                          |              |                                           |             |
|------------------------------------------|--------------|-------------------------------------------|-------------|
| F1—Dy1—Dy1 <sup>i</sup>                  | 169.89 (6)   | F1 <sup>ix</sup> —Na1—Na1 <sup>viii</sup> | 46.66 (6)   |
| F1 <sup>iii</sup> —Dy1—Dy1 <sup>i</sup>  | 33.40 (5)    | F1 <sup>ix</sup> —Na1—Na1 <sup>ii</sup>   | 144.02 (7)  |
| F1 <sup>v</sup> —Dy1—Dy1 <sup>i</sup>    | 101.80 (5)   | F1 <sup>x</sup> —Na1—Na1 <sup>viii</sup>  | 46.66 (6)   |
| F1 <sup>iii</sup> —Dy1—Na1 <sup>ii</sup> | 43.25 (6)    | F1 <sup>v</sup> —Na1—Na1 <sup>viii</sup>  | 117.24 (10) |
| F1 <sup>iv</sup> —Dy1—Na1 <sup>ii</sup>  | 102.70 (5)   | F1 <sup>v</sup> —Na1—F1 <sup>ix</sup>     | 108.81 (9)  |
| F1 <sup>iv</sup> —Dy1—Na1                | 100.47 (6)   | F1 <sup>iii</sup> —Na1—F1 <sup>ix</sup>   | 161.81 (12) |
| F1 <sup>v</sup> —Dy1—Na1 <sup>ii</sup>   | 43.25 (6)    | F1 <sup>ix</sup> —Na1—F1 <sup>x</sup>     | 67.57 (12)  |
| F1—Dy1—Na1                               | 100.47 (6)   | F1 <sup>iii</sup> —Na1—F1 <sup>v</sup>    | 68.71 (12)  |
| F1 <sup>iii</sup> —Dy1—Na1               | 42.61 (6)    | F1 <sup>v</sup> —Na1—F1 <sup>x</sup>      | 161.81 (12) |
| F1—Dy1—Na1 <sup>ii</sup>                 | 102.69 (5)   | F1 <sup>iii</sup> —Na1—F1 <sup>x</sup>    | 108.81 (9)  |
| F1 <sup>v</sup> —Dy1—Na1                 | 42.61 (6)    | F1 <sup>v</sup> —Na1—O2 <sup>ii</sup>     | 124.77 (11) |
| F1 <sup>iv</sup> —Dy1—F1                 | 153.36 (11)  | F1 <sup>iii</sup> —Na1—O2 <sup>ii</sup>   | 124.77 (11) |
| F1—Dy1—F1 <sup>iii</sup>                 | 137.25 (6)   | F1 <sup>x</sup> —Na1—O2 <sup>ii</sup>     | 72.10 (10)  |
| F1 <sup>iv</sup> —Dy1—F1 <sup>iii</sup>  | 68.90 (9)    | F1 <sup>ix</sup> —Na1—O2 <sup>ii</sup>    | 72.10 (10)  |
| F1 <sup>iv</sup> —Dy1—F1 <sup>v</sup>    | 137.25 (6)   | F1 <sup>iii</sup> —Na1—O3 <sup>ii</sup>   | 82.67 (10)  |
| F1 <sup>iii</sup> —Dy1—F1 <sup>v</sup>   | 68.43 (11)   | F1 <sup>ix</sup> —Na1—O3 <sup>ii</sup>    | 115.25 (10) |
| F1—Dy1—F1 <sup>v</sup>                   | 68.90 (9)    | F1 <sup>v</sup> —Na1—O3 <sup>ii</sup>     | 82.67 (10)  |
| F1—Dy1—O1                                | 80.69 (6)    | F1 <sup>x</sup> —Na1—O3 <sup>ii</sup>     | 115.25 (10) |
| F1 <sup>v</sup> —Dy1—O1                  | 117.37 (8)   | F1 <sup>v</sup> —Na1—C1 <sup>ii</sup>     | 104.67 (12) |
| F1 <sup>iii</sup> —Dy1—O1                | 117.37 (8)   | F1 <sup>x</sup> —Na1—C1 <sup>ii</sup>     | 93.43 (12)  |
| F1 <sup>iv</sup> —Dy1—O1 <sup>vi</sup>   | 80.45 (6)    | F1 <sup>ix</sup> —Na1—C1 <sup>ii</sup>    | 93.43 (12)  |
| F1 <sup>iv</sup> —Dy1—O1                 | 80.69 (6)    | F1 <sup>iii</sup> —Na1—C1 <sup>ii</sup>   | 104.67 (12) |
| F1—Dy1—O1 <sup>vi</sup>                  | 80.45 (6)    | O2 <sup>ii</sup> —Na1—Dy1 <sup>viii</sup> | 40.52 (9)   |
| F1 <sup>iv</sup> —Dy1—O2 <sup>vii</sup>  | 96.41 (6)    | O2 <sup>ii</sup> —Na1—Dy1                 | 160.99 (12) |
| F1—Dy1—O2 <sup>vii</sup>                 | 96.41 (6)    | O2 <sup>ii</sup> —Na1—Na1 <sup>viii</sup> | 102.63 (12) |
| F1 <sup>v</sup> —Dy1—O3                  | 73.27 (8)    | O2 <sup>ii</sup> —Na1—Na1 <sup>ii</sup>   | 98.51 (12)  |
| F1 <sup>iii</sup> —Dy1—O3                | 73.27 (8)    | O2 <sup>ii</sup> —Na1—O3 <sup>ii</sup>    | 52.58 (12)  |
| F1—Dy1—O3                                | 92.19 (6)    | O2 <sup>ii</sup> —Na1—C1 <sup>ii</sup>    | 25.83 (13)  |
| F1 <sup>iv</sup> —Dy1—O3                 | 92.19 (6)    | O3 <sup>ii</sup> —Na1—Dy1                 | 108.41 (10) |
| F1 <sup>iv</sup> —Dy1—C1                 | 86.08 (6)    | O3 <sup>ii</sup> —Na1—Dy1 <sup>viii</sup> | 93.10 (10)  |
| F1—Dy1—C1                                | 86.08 (6)    | O3—Na1—Dy1                                | 43.51 (9)   |
| F1 <sup>v</sup> —Dy1—C1                  | 95.35 (10)   | O3—Na1—Dy1 <sup>viii</sup>                | 114.98 (12) |
| F1 <sup>iii</sup> —Dy1—C1                | 95.35 (10)   | O3 <sup>ii</sup> —Na1—Na1 <sup>ii</sup>   | 45.93 (9)   |
| O1 <sup>vi</sup> —Dy1—Dy1 <sup>i</sup>   | 109.461 (18) | O3—Na1—Na1 <sup>viii</sup>                | 52.87 (11)  |
| O1—Dy1—Dy1 <sup>i</sup>                  | 100.99 (3)   | O3 <sup>ii</sup> —Na1—Na1 <sup>viii</sup> | 155.22 (13) |
| O1 <sup>vi</sup> —Dy1—Na1                | 174.03 (9)   | O3—Na1—Na1 <sup>ii</sup>                  | 105.99 (13) |
| O1—Dy1—Na1                               | 96.64 (9)    | O3—Na1—F1 <sup>v</sup>                    | 74.25 (10)  |
| O1—Dy1—Na1 <sup>ii</sup>                 | 152.05 (9)   | O3—Na1—F1 <sup>x</sup>                    | 87.68 (11)  |
| O1 <sup>vi</sup> —Dy1—Na1 <sup>ii</sup>  | 118.62 (9)   | O3—Na1—F1 <sup>ix</sup>                   | 87.68 (11)  |
| O1 <sup>vi</sup> —Dy1—F1 <sup>iii</sup>  | 133.84 (8)   | O3—Na1—F1 <sup>iii</sup>                  | 74.25 (10)  |
| O1 <sup>vi</sup> —Dy1—F1 <sup>v</sup>    | 133.84 (8)   | O3—Na1—O2 <sup>ii</sup>                   | 155.51 (15) |
| O1 <sup>vi</sup> —Dy1—O1                 | 89.33 (6)    | O3—Na1—O3 <sup>ii</sup>                   | 151.91 (15) |
| O1 <sup>vi</sup> —Dy1—O3                 | 143.48 (12)  | O3—Na1—C1 <sup>ii</sup>                   | 178.67 (17) |
| O1 <sup>vi</sup> —Dy1—C1                 | 116.64 (13)  | O3 <sup>ii</sup> —Na1—C1 <sup>ii</sup>    | 26.75 (13)  |

|                                                        |             |                                             |             |
|--------------------------------------------------------|-------------|---------------------------------------------|-------------|
| O1—Dy1—C1                                              | 27.31 (13)  | C1 <sup>ii</sup> —Na1—Dy1                   | 135.16 (13) |
| O2 <sup>vii</sup> —Dy1—Dy1 <sup>i</sup>                | 84.57 (4)   | C1 <sup>ii</sup> —Na1—Dy1 <sup>viii</sup>   | 66.35 (12)  |
| O2 <sup>vii</sup> —Dy1—Na1 <sup>ii</sup>               | 43.56 (10)  | C1 <sup>ii</sup> —Na1—Na1 <sup>viii</sup>   | 128.46 (15) |
| O2 <sup>vii</sup> —Dy1—Na1                             | 98.96 (10)  | C1 <sup>ii</sup> —Na1—Na1 <sup>ii</sup>     | 72.68 (13)  |
| O2 <sup>vii</sup> —Dy1—F1 <sup>iii</sup>               | 75.05 (9)   | Dy1—F1—Dy1 <sup>v</sup>                     | 111.10 (9)  |
| O2 <sup>vii</sup> —Dy1—F1 <sup>v</sup>                 | 75.05 (9)   | Dy1—F1—Na1 <sup>v</sup>                     | 128.96 (10) |
| O2 <sup>vii</sup> —Dy1—O1 <sup>vi</sup>                | 75.06 (13)  | Dy1 <sup>v</sup> —F1—Na1 <sup>xi</sup>      | 94.08 (9)   |
| O2 <sup>vii</sup> —Dy1—O1                              | 164.39 (13) | Dy1—F1—Na1 <sup>xi</sup>                    | 132.53 (10) |
| O2 <sup>vii</sup> —Dy1—O3                              | 141.45 (12) | Na1 <sup>v</sup> —F1—Dy1 <sup>v</sup>       | 94.58 (9)   |
| O2 <sup>vii</sup> —Dy1—C1                              | 168.30 (14) | Na1 <sup>v</sup> —F1—Na1 <sup>xi</sup>      | 85.77 (7)   |
| O3—Dy1—Dy1 <sup>i</sup>                                | 80.99 (3)   | Dy1 <sup>xii</sup> —O1—Dy1                  | 136.51 (15) |
| O3—Dy1—Na1 <sup>ii</sup>                               | 97.90 (9)   | C1—O1—Dy1                                   | 93.0 (3)    |
| O3—Dy1—Na1                                             | 42.49 (9)   | C1—O1—Dy1 <sup>xii</sup>                    | 130.5 (3)   |
| O3—Dy1—O1                                              | 54.15 (12)  | Dy1 <sup>xiii</sup> —O2—Na1 <sup>viii</sup> | 95.92 (14)  |
| O3—Dy1—C1                                              | 26.84 (13)  | C1—O2—Dy1 <sup>xiii</sup>                   | 166.1 (4)   |
| C1—Dy1—Dy1 <sup>i</sup>                                | 91.01 (4)   | C1—O2—Na1 <sup>viii</sup>                   | 98.0 (3)    |
| C1—Dy1—Na1                                             | 69.33 (11)  | Dy1—O3—Na1 <sup>viii</sup>                  | 175.21 (16) |
| C1—Dy1—Na1 <sup>ii</sup>                               | 124.74 (11) | Na1—O3—Dy1                                  | 94.00 (13)  |
| Dy1—Na1—Dy1 <sup>viii</sup>                            | 158.49 (7)  | Na1—O3—Na1 <sup>viii</sup>                  | 81.20 (11)  |
| Na1 <sup>ii</sup> —Na1—Dy1                             | 62.48 (7)   | C1—O3—Dy1                                   | 96.5 (3)    |
| Na1 <sup>viii</sup> —Na1—Dy1                           | 96.38 (9)   | C1—O3—Na1 <sup>viii</sup>                   | 88.2 (3)    |
| Na1 <sup>viii</sup> —Na1—Dy1 <sup>viii</sup>           | 62.11 (6)   | C1—O3—Na1                                   | 169.4 (3)   |
| Na1 <sup>ii</sup> —Na1—Dy1 <sup>viii</sup>             | 139.03 (10) | Dy1—C1—Na1 <sup>viii</sup>                  | 121.61 (19) |
| Na1 <sup>ii</sup> —Na1—Na1 <sup>vi</sup> <sup>ii</sup> | 158.86 (14) | O1—C1—Dy1                                   | 59.7 (3)    |
| F1 <sup>x</sup> —Na1—Dy1                               | 122.83 (8)  | O1—C1—Na1 <sup>viii</sup>                   | 178.7 (4)   |
| F1 <sup>v</sup> —Na1—Dy1 <sup>viii</sup>               | 145.22 (6)  | O2—C1—Dy1                                   | 177.8 (4)   |
| F1 <sup>iii</sup> —Na1—Dy1                             | 42.81 (6)   | O2—C1—Na1 <sup>viii</sup>                   | 56.2 (3)    |
| F1 <sup>x</sup> —Na1—Dy1 <sup>viii</sup>               | 42.66 (6)   | O2—C1—O1                                    | 122.5 (5)   |
| F1 <sup>v</sup> —Na1—Dy1                               | 42.81 (6)   | O2—C1—O3                                    | 121.2 (5)   |
| F1 <sup>iii</sup> —Na1—Dy1 <sup>viii</sup>             | 145.22 (6)  | O3—C1—Dy1                                   | 56.6 (3)    |
| F1 <sup>ix</sup> —Na1—Dy1                              | 122.83 (8)  | O3—C1—Na1 <sup>viii</sup>                   | 65.0 (3)    |
| F1 <sup>ix</sup> —Na1—Dy1 <sup>viii</sup>              | 42.66 (6)   | O3—C1—O1                                    | 116.3 (5)   |

Symmetry codes: (i)  $-x, -y, -z+1$ ; (ii)  $x-1/2, y, -z+1/2$ ; (iii)  $-x, y-1/2, -z+1$ ; (iv)  $x, -y+1/2, z$ ; (v)  $-x, -y+1, -z+1$ ; (vi)  $x-1/2, y, -z+3/2$ ; (vii)  $x-1, y, z$ ; (viii)  $x+1/2, y, -z+1/2$ ; (ix)  $-x+1/2, -y+1, z-1/2$ ; (x)  $-x+1/2, y-1/2, z-1/2$ ; (xi)  $-x+1/2, -y+1, z+1/2$ ; (xii)  $x+1/2, y, -z+3/2$ ; (xiii)  $x+1, y, z$ .

**Table S5.** Selected bond lengths (Å), bond valence (BV), and bond valence sum (BVS) for NaDy(CO<sub>3</sub>)F<sub>2</sub>.

| Bond       | Bond length (Å) |        | BV (v.u.) |        |        |        |        |
|------------|-----------------|--------|-----------|--------|--------|--------|--------|
| Dy1—F1     | 2.2335          |        | 0.4103    |        |        |        |        |
| Dy1—F1     | 2.3554          |        | 0.3091    |        |        |        |        |
| Dy1—F1     | 2.3554          |        | 0.3091    |        |        |        |        |
| Dy1—F1     | 2.2335          |        | 0.4103    |        |        |        |        |
| Dy1—O1     | 2.4531          |        | 0.3158    |        |        |        |        |
| Dy1—O1     | 2.3498          |        | 0.4020    |        |        |        |        |
| Dy1—O2     | 2.2644          |        | 0.4910    |        |        |        |        |
| Dy1—O3     | 2.3844          |        | 0.3708    |        |        |        |        |
| Na1—F1     | 2.3812          |        | 0.1364    |        |        |        |        |
| Na1—F1     | 2.3466          |        | 0.1466    |        |        |        |        |
| Na1—F1     | 2.3812          |        | 0.1364    |        |        |        |        |
| Na1—F1     | 2.3466          |        | 0.146     |        |        |        |        |
| Na1—O2     | 2.4020          |        | 0.1743    |        |        |        |        |
| Na1—O3     | 2.5962          |        | 0.1164    |        |        |        |        |
| Na1—O3     | 2.3393          |        | 0.1986    |        |        |        |        |
| C1—O1      | 1.3033          |        | 1.2272    |        |        |        |        |
| C1—O2      | 1.2600          |        | 1.3475    |        |        |        |        |
| C1—O3      | 1.2893          |        | 1.2650    |        |        |        |        |
|            |                 |        |           |        |        |        |        |
| Atom       | Dy              | Na     | C         | O1     | O2     | O3     | F      |
| BVS (v.u.) | 3.0966          | 1.1410 | 3.9786    | 2.0173 | 2.0885 | 1.9953 | 1.0575 |

**Table S6.** Weiss temperatures ( $\Theta$ ), Curie constant ( $C$ ), temperature-independent contribution ( $\chi_0$ ), and effective moments ( $\mu_{eff}$ ) are determined by fitting the Curie–Weiss law to the magnetic susceptibility data.

| $\chi = \chi_0 + C/(T-\Theta)$ |              |       |          |             |
|--------------------------------|--------------|-------|----------|-------------|
| Temperature range (K)          | $\Theta$ (K) | $C$   | $\chi_0$ | $\mu_{eff}$ |
| 15-30                          | 0.19(3)      | 15.56 | -0.00271 | 11.16       |
| 150-300                        | -7.66(12)    | 16.97 | -0.00474 | 11.65       |

## Reference

1. A. B. Ali, M. Leblanc and V. Maisonneuve, *Acta Crystallographica Section E Structure Reports Online*, 2006, **62**, i133-i134.
2. G. M. Sheldrick, *Acta Crystallogr C Struct Chem*, 2015, **71**, 3-8.
3. L. J. Bourhis, O. V. Dolomanov, R. J. Gildea, J. A. Howard and H. Puschmann, *Acta Crystallogr A Found Adv*, 2015, **71**, 59-75.
